# Supplementary material for: A biogeochemical approach to understanding the accumulation patterns of trace elements in three species of dragonfly larvae: evaluation as biomonitors
Source: Royal Society of Chemistry journal article supplement (doi:10.1039/b920379f), 2010-01-01
Supplement: b920379f.pdf [file b920379f.pdf]

**A biogeochemical approach to understanding the accumulation patterns of trace elements in three species of dragonfly larvae: evaluation as biomonitors**

**Isela Lavilla *et al.* DOI: 10.1039/b920379f**

**Data of concentrations (dry weights) of trace elements in Odonata larvae from the literature.**

| Element      | Concentration<br>( $\mu\text{g g}^{-1}$ ) | Taxon                                                                                 | Site                                                                                   | Reference |
|--------------|-------------------------------------------|---------------------------------------------------------------------------------------|----------------------------------------------------------------------------------------|-----------|
| <b>Fe</b>    | 912                                       | Anisoptera                                                                            | Iron and steel factory in Koverhar (Finland)                                           | (12)      |
|              | 116                                       | Anisoptera                                                                            | Control area (Finland). Unpolluted.                                                    | (12)      |
| <b>Mn</b>    | 6.5                                       | Anisoptera                                                                            | Iron and steel factory in Koverhar (Finland)                                           | (12)      |
|              | 2.8                                       | Anisoptera                                                                            | Control area (Finland). Unpolluted.                                                    | (12)      |
|              | 82.53                                     | Benthic macroinvertebrate (Odonata)                                                   | Rhumel River and Boumerzog River (Algeria). Urban, industrial and agricultural wastes. | (14)      |
| <b>Zn</b>    | 163                                       | Zygoptera ( <i>Ischnura elegans</i> )                                                 | Dommel River (Netherlands). Polluted.                                                  | (33)      |
|              | 98-106                                    | Zygoptera ( <i>Ischnura elegans</i> )                                                 | Maarsseveen (Netherlands). Unpolluted lake                                             | (33)      |
|              | 91.6                                      | Anisoptera (Libellulidae)                                                             | Lakes from three sites with different water chemistry (Canada)                         | (11)      |
|              | 97                                        | Anisoptera                                                                            | Iron and steel factory in Koverhar (Finland)                                           | (12)      |
|              | 95                                        | Anisoptera                                                                            | Control area (Finland). Unpolluted.                                                    | (12)      |
| 76.4 – 203.3 | Odonata (Anisoptera/Zygoptera)            | Stormwater treatment ponds in Maryland (USA)                                          | (13)                                                                                   |           |
| <b>Cu</b>    | 29                                        | Zygoptera ( <i>Ischnura elegans</i> )                                                 | Dommel River (Netherlands). Polluted                                                   | (33)      |
|              | 12-13                                     | Zygoptera ( <i>Ischnura elegans</i> )                                                 | Maarsseveen (Netherlands). Unpolluted lake.                                            | (33)      |
|              | 25.8                                      | Anisoptera (Libellulidae)                                                             | Lakes from three sites with different water chemistry (Canada)                         | (11)      |
|              | 34                                        | Anisoptera                                                                            | Iron and steel factory in Koverhar (Finland)                                           | (12)      |
|              | 37                                        | Anisoptera                                                                            | Control area (Finland). Unpolluted.                                                    | (12)      |
| 11.3 – 62.2  | Odonata (Anisoptera/Zygoptera)            | Stormwater treatment ponds in Maryland (USA)                                          | (13)                                                                                   |           |
| <b>Ni</b>    | 2.9                                       | Anisoptera (Libellulidae)                                                             | Lakes from three sites with different water chemistry (Canada)                         | (11)      |
|              | 3.0                                       | Anisoptera                                                                            | Iron and steel factory in Koverhar (Finland)                                           | (12)      |
|              | 1.0                                       | Anisoptera                                                                            | Control area (Finland). Unpolluted.                                                    | (12)      |
| <b>Cr</b>    | 14                                        | Benthic macroinvertebrate (Odonata)                                                   | Rhumel River and Boumerzog River (Algeria). Urban, industrial and agricultural wastes  | (14)      |
| <b>Pb</b>    | 15.34                                     | Zygoptera ( <i>Ischnura elegans</i> )                                                 | Dommel River (Netherlands). Polluted                                                   | (33)      |
|              | 1.2 - 5.1                                 | Zygoptera ( <i>Ischnura elegans</i> )                                                 | Maarsseveen (Netherlands). Unpolluted lake                                             | (33)      |
|              | 2.5                                       | Anisoptera (Libellulidae)                                                             | Lakes from three sites with different water chemistry (Canada)                         | (11)      |
|              | 1.8                                       | Anisoptera                                                                            | Iron and steel factory in Koverhar (Finland)                                           | (12)      |
|              | 1.0                                       | Anisoptera                                                                            | Control area (Finland). Unpolluted.                                                    | (12)      |
|              | <0.02 - 4.81                              | Odonata (Anisoptera/Zygoptera)                                                        | Stormwater treatment ponds in Maryland (USA)                                           | (13)      |
| 34.3         | Benthic macroinvertebrate (Odonata)       | Rhumel River and Boumerzog River (Algeria). Urban, industrial and agricultural wastes | (14)                                                                                   |           |
| <b>Cd</b>    | 1.66                                      | Zygoptera ( <i>Ischnura elegans</i> )                                                 | Dommel River (Netherlands). Polluted                                                   | (33)      |

**A biogeochemical approach to understanding the accumulation patterns of trace elements in three species of dragonfly larvae: evaluation as biomonitors**

**Isela Lavilla *et al.* DOI: 10.1039/b920379f**

**Data of concentrations (dry weights) of trace elements in Odonata larvae from the literature.**

| Element      | Concentration<br>( $\mu\text{g g}^{-1}$ ) | Taxon                                                                                 | Site                                                                                   | Reference |
|--------------|-------------------------------------------|---------------------------------------------------------------------------------------|----------------------------------------------------------------------------------------|-----------|
| <b>Fe</b>    | 912                                       | Anisoptera                                                                            | Iron and steel factory in Koverhar (Finland)                                           | (12)      |
|              | 116                                       | Anisoptera                                                                            | Control area (Finland). Unpolluted.                                                    | (12)      |
| <b>Mn</b>    | 6.5                                       | Anisoptera                                                                            | Iron and steel factory in Koverhar (Finland)                                           | (12)      |
|              | 2.8                                       | Anisoptera                                                                            | Control area (Finland). Unpolluted.                                                    | (12)      |
|              | 82.53                                     | Benthic macroinvertebrate (Odonata)                                                   | Rhumel River and Boumerzog River (Algeria). Urban, industrial and agricultural wastes. | (14)      |
| <b>Zn</b>    | 163                                       | Zygoptera ( <i>Ischnura elegans</i> )                                                 | Dommel River (Netherlands). Polluted.                                                  | (33)      |
|              | 98-106                                    | Zygoptera ( <i>Ischnura elegans</i> )                                                 | Maarsseveen (Netherlands). Unpolluted lake                                             | (33)      |
|              | 91.6                                      | Anisoptera (Libellulidae)                                                             | Lakes from three sites with different water chemistry (Canada)                         | (11)      |
|              | 97                                        | Anisoptera                                                                            | Iron and steel factory in Koverhar (Finland)                                           | (12)      |
|              | 95                                        | Anisoptera                                                                            | Control area (Finland). Unpolluted.                                                    | (12)      |
| 76.4 – 203.3 | Odonata (Anisoptera/Zygoptera)            | Stormwater treatment ponds in Maryland (USA)                                          | (13)                                                                                   |           |
| <b>Cu</b>    | 29                                        | Zygoptera ( <i>Ischnura elegans</i> )                                                 | Dommel River (Netherlands). Polluted                                                   | (33)      |
|              | 12-13                                     | Zygoptera ( <i>Ischnura elegans</i> )                                                 | Maarsseveen (Netherlands). Unpolluted lake.                                            | (33)      |
|              | 25.8                                      | Anisoptera (Libellulidae)                                                             | Lakes from three sites with different water chemistry (Canada)                         | (11)      |
|              | 34                                        | Anisoptera                                                                            | Iron and steel factory in Koverhar (Finland)                                           | (12)      |
|              | 37                                        | Anisoptera                                                                            | Control area (Finland). Unpolluted.                                                    | (12)      |
| 11.3 – 62.2  | Odonata (Anisoptera/Zygoptera)            | Stormwater treatment ponds in Maryland (USA)                                          | (13)                                                                                   |           |
| <b>Ni</b>    | 2.9                                       | Anisoptera (Libellulidae)                                                             | Lakes from three sites with different water chemistry (Canada)                         | (11)      |
|              | 3.0                                       | Anisoptera                                                                            | Iron and steel factory in Koverhar (Finland)                                           | (12)      |
|              | 1.0                                       | Anisoptera                                                                            | Control area (Finland). Unpolluted.                                                    | (12)      |
| <b>Cr</b>    | 14                                        | Benthic macroinvertebrate (Odonata)                                                   | Rhumel River and Boumerzog River (Algeria). Urban, industrial and agricultural wastes  | (14)      |
| <b>Pb</b>    | 15.34                                     | Zygoptera ( <i>Ischnura elegans</i> )                                                 | Dommel River (Netherlands). Polluted                                                   | (33)      |
|              | 1.2 - 5.1                                 | Zygoptera ( <i>Ischnura elegans</i> )                                                 | Maarsseveen (Netherlands). Unpolluted lake                                             | (33)      |
|              | 2.5                                       | Anisoptera (Libellulidae)                                                             | Lakes from three sites with different water chemistry (Canada)                         | (11)      |
|              | 1.8                                       | Anisoptera                                                                            | Iron and steel factory in Koverhar (Finland)                                           | (12)      |
|              | 1.0                                       | Anisoptera                                                                            | Control area (Finland). Unpolluted.                                                    | (12)      |
|              | <0.02 - 4.81                              | Odonata (Anisoptera/Zygoptera)                                                        | Stormwater treatment ponds in Maryland (USA)                                           | (13)      |
| 34.3         | Benthic macroinvertebrate (Odonata)       | Rhumel River and Boumerzog River (Algeria). Urban, industrial and agricultural wastes | (14)                                                                                   |           |
| <b>Cd</b>    | 1.66                                      | Zygoptera ( <i>Ischnura elegans</i> )                                                 | Dommel River (Netherlands). Polluted                                                   | (33)      |

## Supplementary Material (ESI) for Journal of Environmental Monitoring

This journal is © The Royal Society of Chemistry 2010

|             |                                       |                                                                                       |      |
|-------------|---------------------------------------|---------------------------------------------------------------------------------------|------|
| 0.04 - 0.26 | Zygoptera ( <i>Ischnura elegans</i> ) | Maarsseveen (Netherland). Unpolluted lake                                             | (33) |
| 0.2         | Anisoptera (Libellulidae)             | Lakes from three sites with different water chemistry (Canada)                        | (11) |
| 0.86        | Anisoptera                            | Iron and steel factory in Koverhar (Finland)                                          | (12) |
| 0.12        | Anisoptera                            | Control area (Finland). Unpolluted.                                                   | (12) |
| 0.46        | Benthic macroinvertebrate (Odonata)   | Rhumel River and Boumerzog River (Algeria). Urban, industrial and agricultural wastes | (14) |

---

Comparing the values found for the three species with those published for Odonata larvae, it can be seen that many of the measured Fe and Mn contents are higher than the values published for a polluted area next to a steel factory.<sup>12</sup> When the concentration values of Cu and Zn in this study are compared with those found for *I. elegans*,<sup>33</sup> it can be concluded that the levels of Cu are above the reference value given for non-polluted zones and the Zn values are close to the reference value in most cases. Cd levels are below the reference values for polluted zones.<sup>33,12</sup> Ni values are, in most points, below the reference values for polluted zones in Nummelin *et al.*<sup>12</sup> with the exception of some concentrations which are up to four times higher. Pb concentrations are similar to those found by Timmermans<sup>33</sup> for non-polluted zones in *I. elegans*. This author found significant differences in the levels of Pb between non-polluted and polluted zones, whilst Nummelin *et al.*<sup>12</sup> found very small differences in dragonfly larvae for this element. Information in the literature about Cr content in Odonata is scarce. Afri-Mehennaoui *et al.*<sup>14</sup> determined this element in a number of different macro-invertebrates (with some Odonata). The found value in this reference is greater than those found in the present work.

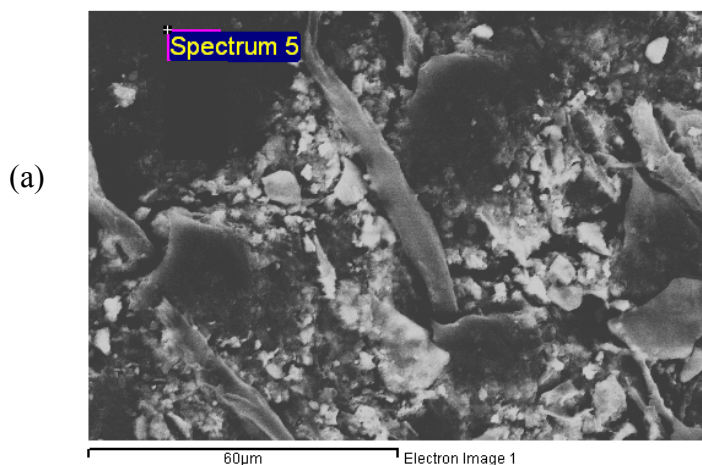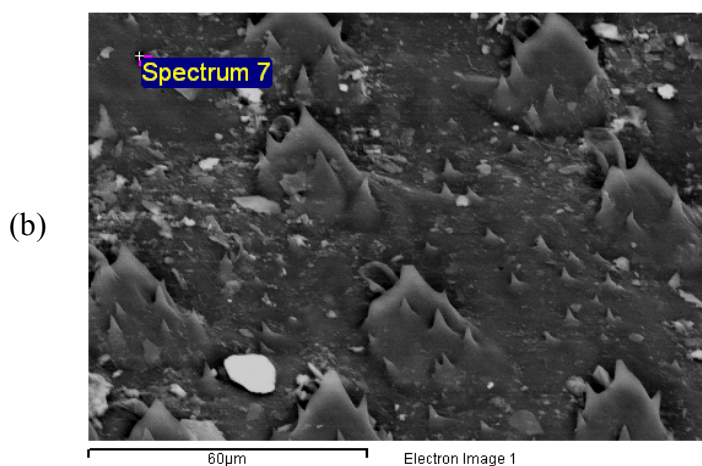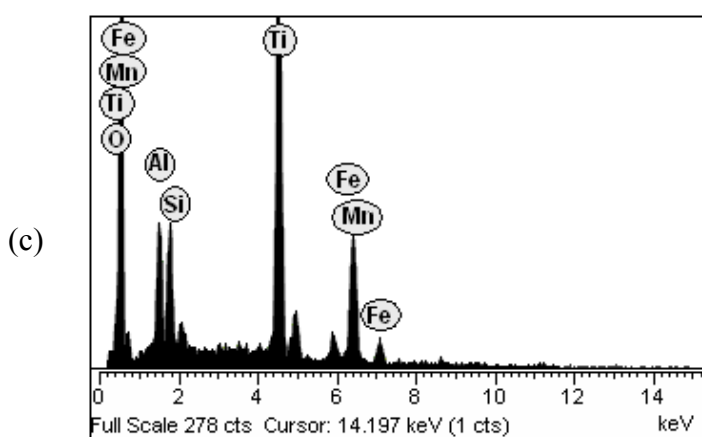

**(a) Scanning electron micrograph of the surface of a specimen of *C. boltoni* collected from point 10 in the Louro River, washed with water (b) Scanning electron micrograph of the surface of a specimen of *C. boltoni* collected from point 10 in the Louro River, washed with EDTA-HCl. (c): Energy dispersive X-ray analysis of particles? of the surface of the specimen washed with water.**

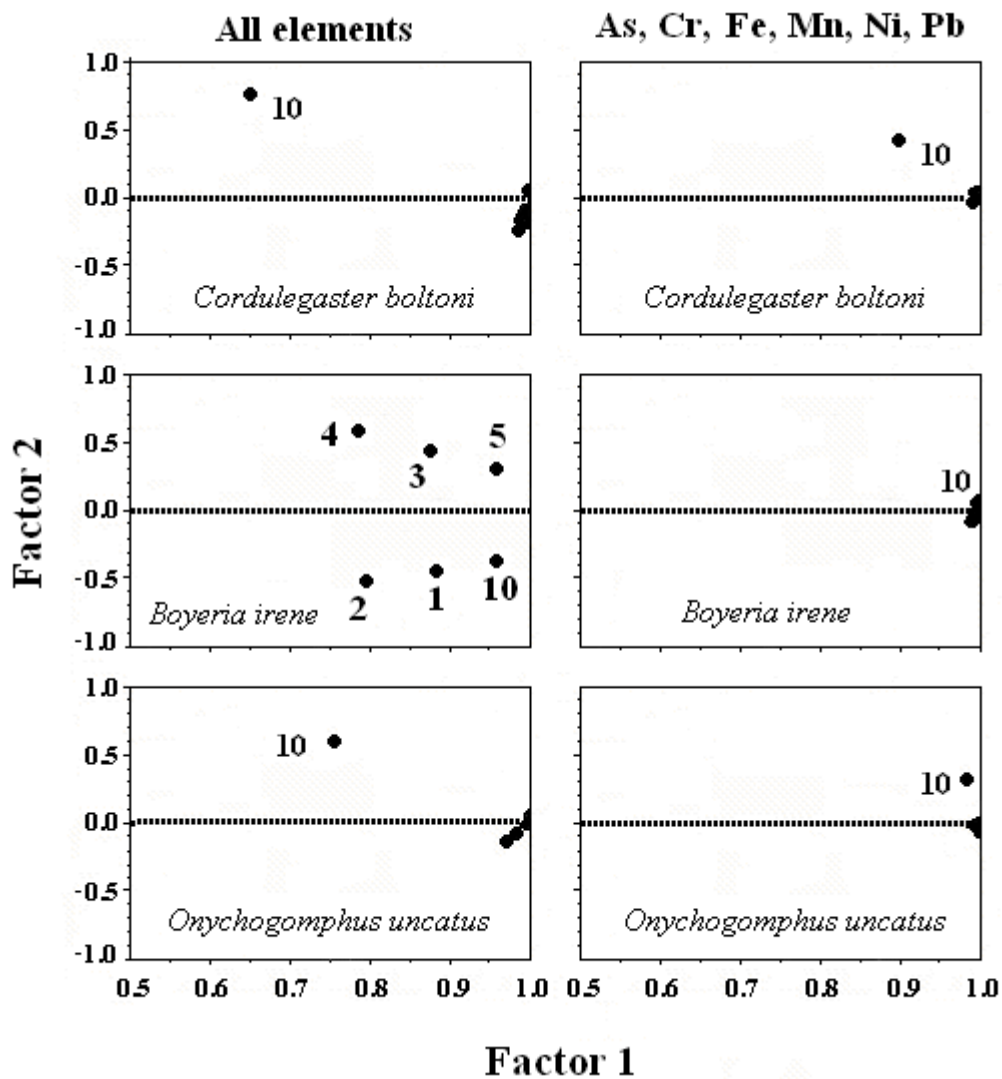

PCA loading plots of the concentrations of all elements and As, Cr, Fe, Mn, Ni and Pb for the three species in the different sampling points.

SOME NUMERICAL RESULTS

- ✓ Section “Total heavy metals and Arsenic in Dragonfly larvae: Chemometric interpretation of results”:

*Coefficients of variation (CVs, %) for Cu and Zn in Odonata*

|                   |      |      | Molar fraction | Molar fraction |
|-------------------|------|------|----------------|----------------|
|                   | Cu   | Zn   | Cu             | Zn             |
| <i>C. boltoni</i> | 24.0 | 29.6 | 9.8            | 2.8            |
| <i>B. irene</i>   | 15.5 | 33.3 | 21.0           | 4.0            |
| <i>O. uncatus</i> | 24.0 | 31.0 | 5.6            | 1.9            |

*Pearson correlation coefficients (CCs, %) in Odonata*

|                   | Zn-Cu | Cd-Cu | Cd-Zn |
|-------------------|-------|-------|-------|
| <i>C. boltoni</i> | 0.882 | 0.646 | 0.489 |
| <i>B. irene</i>   | 0.800 | 0.729 | 0.821 |
| <i>O. uncatus</i> | 0.982 | 0.850 | 0.870 |

✓ Section “Accumulation patterns of trace elements in dragonfly larvae”:

*Mean value removed by washing (%)*

|                   | As | Fe | Mn | Cd | Ni | Cr | Pb |
|-------------------|----|----|----|----|----|----|----|
| <i>C. boltoni</i> | 98 | 70 | 73 | 50 | 45 | 50 | 38 |
| <i>B. irene</i>   | 99 | 68 | 69 | 52 | 47 | 35 | 54 |
| <i>O. uncatus</i> | 98 | 71 | 70 | 52 | 50 | 20 | 80 |

*Concentration ratios in sediments and larvae*

|           | <u>Al/Si</u> | <u>Fe/Si</u> | <u>Mn/Si</u> |
|-----------|--------------|--------------|--------------|
| Sediments | 0.3-0.5      | 0.06-0.1     | 0.001        |
| Larvae    | 0.7-1.5      | 0.3-9.6      | 0.02-0.04    |

✓ Section “Relations with geochemistry: trace elements in sediments and dragonfly larvae”:

*Pearson correlation coefficients (CCs, %) between Odonata and sediments*

|                   | As (V) | Total Pb | Cr                                                                                       |
|-------------------|--------|----------|------------------------------------------------------------------------------------------|
| <i>C. boltoni</i> | 0.840  | 0.603    | First fraction, 0.961<br>Second fraction, 0.882<br>Third fraction, 0.889<br>Total, 0.852 |
| <i>B. irene</i>   | 0.907  | 0.717    | Second fraction, 0.895<br>Third fraction, 0.686                                          |
| <i>O. uncatus</i> | 0.950  | 0.938    | -----                                                                                    |



✓ Section “Dragonfly larvae as biomonitors of concentration by trace element”:

*Mean concentration of different element in Hydropsyche ( $\mu\text{g g}^{-1}$ )*

| As  | Cd  | Cr  | Cu  | Fe  | Mn  | Ni | Pb  | Zn  |
|-----|-----|-----|-----|-----|-----|----|-----|-----|
| 3.2 | 1.0 | 2.9 | 160 | 3.8 | 938 | 81 | 3.2 | 203 |

*Hydropsyche* larvae have been extensively used as biomonitors of heavy metals in fresh water ecosystems due to their high tolerance to metals.<sup>9</sup> Levels of trace elements in the sample of *Hydropsyche* taken from the Louro River were, in many cases, of the same order as those found in dragonfly larvae (Table 1), with the exception of Cu, Ni and Fe (contents of these elements were highest in this genus). *Hydropsyche* larvae were only found in the first four sampling points, because many of the species cannot tolerate the organic pollution in the water, and moreover, they need an abundance of pebbles and gravel in the river bed. Dragonfly larvae appear as possible biomonitors as opposed to *Hydropsyche* in the Louro River because they are more abundant along the course of this river, the time for larval development is longer, the species is easy to identify and its body size is suitable.
